# Supplementary material
Source: PubMed Central journal article supplement (PMC4470578)
Supplement: NIHMS699485-supplement-supplement_1.pdf [file NIHMS699485-supplement-supplement_1.pdf]

1  
2  
3 Additional Supporting Information may be found in the online version of this article.  
4  
5

6 **Figure S1: Tissue ATP trends for individual grafts.** *Green* lines represent liver grafts that  
7  
8 have a final ATP content of  $>200$  pmol/mg protein and *blue* lines those that stay below  $>200$   
9 pmol/mg protein.  
10  
11

12  
13 **Table S1: Composition of the perfusate.**  
14  
15  
16  
17  
18  
19  
20  
21  
22  
23  
24  
25  
26  
27  
28  
29  
30  
31  
32  
33  
34  
35  
36  
37  
38  
39  
40  
41  
42  
43  
44  
45  
46  
47  
48  
49  
50  
51  
52  
53  
54  
55  
56  
57  
58  
59  
60

CONFIDENTIAL

1  
2  
3  
4  
5  
6  
7  
8  
9  
10  
11  
12  
13  
14  
15  
16  
17  
18  
19  
20  
21  
22  
23  
24  
25  
26  
27  
28  
29  
30  
31  
32

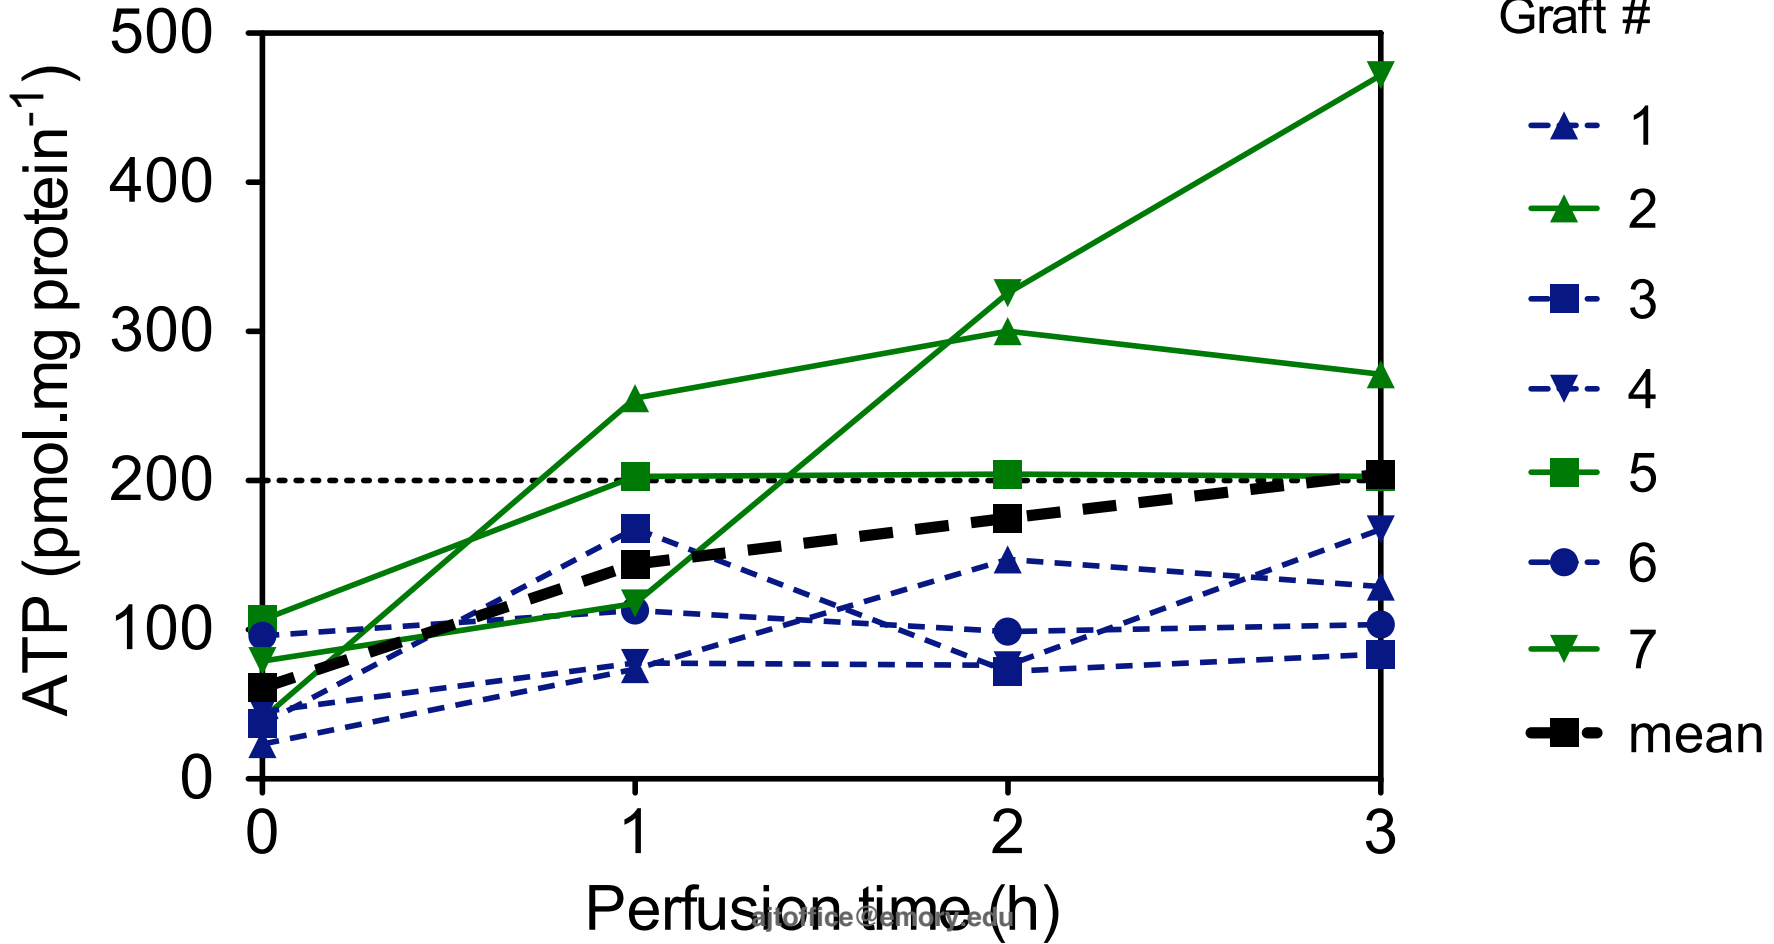

**Table S1****Perfusate composition**

| <b>Inorganic Salts</b>                 | <b>g/L</b> | <b>Amino Acids (continued)</b>          | <b>g/L</b> |
|----------------------------------------|------------|-----------------------------------------|------------|
| Calcium Chloride                       | 0.2        | L-Tyrosine • 2Na • 2H <sub>2</sub> O    | 0.05045    |
| Cupric Sulfate • 5H <sub>2</sub> O     | 0.0000001  | L-Valine                                | 0.05       |
| Ferric Nitrate • 9H <sub>2</sub> O     | 0.0000001  |                                         |            |
| Magnesium Chloride • 4H <sub>2</sub> O | 0.0000001  | <b>Vitamins</b>                         | <b>g/L</b> |
| Magnesium Sulfate (anhydrous)          | 0.0977     | Ascorbic Acid • Na                      | 0.00227    |
| Potassium Chloride                     | 0.4        | D-Biotin                                | 0.0005     |
| Sodium Bicarbonate                     | 2.2        | Calciferol                              | 0.0001     |
| Sodium Chloride                        | 6.8        | Choline Chloride                        | 0.0015     |
| Sodium Phosphate Monobasic (anhydrous) | 0.122      | Folic Acid                              | 0.001      |
| Zinc Sulfate • 7H <sub>2</sub> O       | 0.0000002  | <i>myo</i> -Inositol                    | 0.002      |
|                                        |            | Menadione (sodium bisulfite)            | 0.00001    |
| <b>Amino Acids</b>                     | <b>g/L</b> | Niacinamide                             | 0.001      |
| L-Alanine                              | 0.09       | D-Pantothenic Acid (hemicalcium)        | 0.001      |
| L-Arginine (free base)                 | 0.05       | Pyridoxal • HCl                         | 0.001      |
| L-Asparagine • H <sub>2</sub> O        | 0.02       | Retinol Acetate                         | 0.0001     |
| L-Aspartic Acid                        | 0.03       | Riboflavin                              | 0.0001     |
| L-Cysteine (free acid)                 | 0.04       | Thiamine • HCl                          | 0.001      |
| L-Cystine                              | 0.02       | DL- $\alpha$ -Tocopherol Phosphate • Na | 0.00001    |
| L-Glutamic Acid                        | 0.0445     | Vitamin B12                             | 0.0002     |
| L-Glutamine                            | 0.292      |                                         |            |
| Glycine                                | 0.05       | <b>Other</b>                            | <b>g/L</b> |
| L-Histidine (free base)                | 0.015      | D-Glucose                               | 2          |
| L-Isoleucine                           | 0.05       | Glutathione (reduced)                   | 0.00005    |
| L-Leucine                              | 0.075      | Methyl Linoleate                        | 0.00003    |
| L-Lysine • HCl                         | 0.08746    | Phenol Red • Na                         | 0.0107     |
| L-Methionine                           | 0.015      | Pyruvic Acid • Na                       | 0.025      |
| L-Phenylalanine                        | 0.025      | Penicillin (U/L)                        | 40,000     |
| L-Proline                              | 0.03       | Streptomycin                            | 0.04       |
| L-Serine                               | 0.01       | Humulin R (U//hr)                       | 2          |
| L-Threonine                            | 0.04       | Hydrocortisone                          | 0.01       |
| L-Tryptophan                           | 0.01       | Sodium Bicarbonate (8.4%)               | 30-50 mL   |
